# Supplementary material for: Alcohol consumption and internalising disorders in young adults of ALSPAC: a population-based study
Source: PubMed Central journal article supplement (PMC8886795; doi:10.1136/jech-2020-213922), 2020-07-06
Supplement: NIHMS1780577-supplement-Supplementary_Material4.pdf [file NIHMS1780577-supplement-Supplementary_Material4.pdf]

Appendix 3. The overlap of internalising disorders in the 24-year ALSPAC cohort

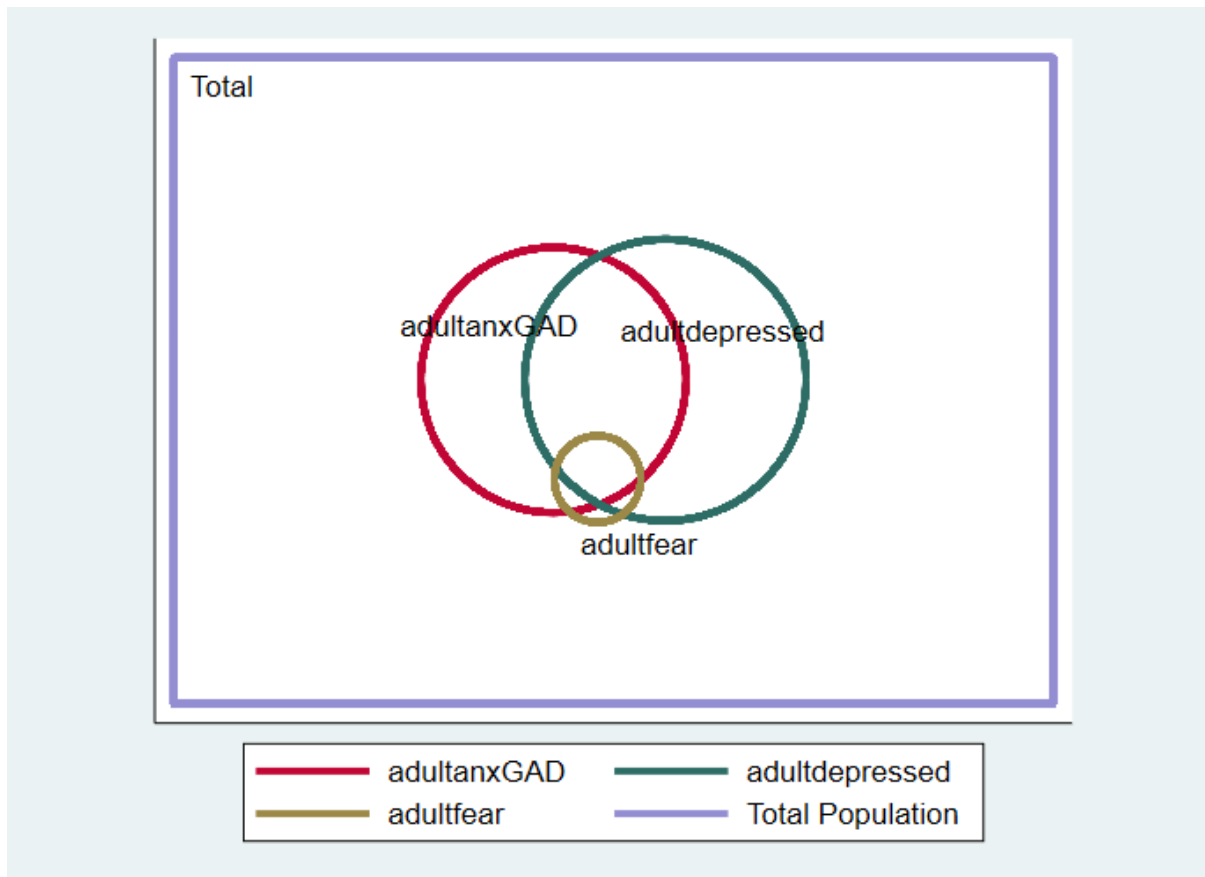

A: adultanxGAD: 347  
B: adultdepressed: 391  
C: adultfear: 37  
AB Overlap: 183  
AC Overlap: 31  
BC Overlap: 29  
ABC Overlap: 26  
Total population: 357

Table showing the results of a multinomial logistic regression model when individual internalising disorders were considered as binary outcomes for hazardous drinkers and harmful drinkers compared with lower-risk drinkers.

| <b>24-year clinic (TF5)<br/>n=3572</b> | Prevalence<br>n (%) | Crude<br>(model 1)<br>OR (95% CI) | Model 2*<br>OR (95% CI) | Model 3*<br>OR (95% CI) |
|----------------------------------------|---------------------|-----------------------------------|-------------------------|-------------------------|
| <i>Lower-risk drinkers</i>             |                     |                                   |                         |                         |
|                                        |                     | 1.00 ref                          | 1.00 ref                | 1.00 ref                |
| <i>Hazardous drinkers</i>              |                     |                                   |                         |                         |
| No diagnosis                           | 1545 (51.26)        | 1.00 ref                          | 1.00 ref                | 1.00 ref                |
| GAD only                               | 71 (4.03)           | 0.83 (0.59-1.16)                  | 0.86 (0.62-1.21)        | 0.88 (0.60-1.30)        |
| Depression only                        | 81 (4.60)           | 0.72 (0.53-0.97)                  | 0.77 (0.56-1.05)        | 0.86 (0.60-1.21)        |
| GAD and Depression only                | 54 (3.06)           | 0.55 (0.38-0.78)                  | 0.58 (0.40-0.83)        | 0.55 (0.36-0.83)        |
| GAD, Depression and FBA                | 7 (0.40)            | 0.47 (0.18-1.20)                  | 0.52 (0.20-1.33)        | 0.46 (0.14-1.56)        |
| <i>Harmful drinkers</i>                |                     |                                   |                         |                         |
| No diagnosis                           | 292 (9.69)          | 1.00 ref                          | 1.00 ref                | 1.00 ref                |
| GAD only                               | 19 (5.01)           | 1.04 (0.61-1.75)                  | 1.14 (0.67-1.91)        | 1.23 (0.69-2.2)         |
| Depression only                        | 34 (8.97)           | 1.47 (0.97-2.21)                  | 1.69 (1.11-2.56)        | 1.61 (0.99-2.61)        |
| GAD and Depression only                | 25 (6.60)           | 1.22 (0.77-1.95)                  | 1.37 (0.85-2.19)        | 1.32 (0.76-2.30)        |
| GAD, Depression and FBA                | 7 (1.85)            | 2.22 (0.86-5.69)                  | 2.72 (1.05-7.03)        | 4.35 (1.54-12.27)       |

\*Model 1 (crude). Model 2 adjusted for sex. Model 3 adjusted for sex, social status, income and maternal education

No diagnosis (none of depression, GAD, FBA) (n=3014)

GAD only (n = 159)

Depression only (n = 205)

GAD and Depression only (n = 157)

GAD, Depression and FBA (n=26)

Some combinations not shown due to small cell-counts: FBA alone (n ≤ 5), GAD and FBA (n ≤ 5), depression and FBA (n ≤ 5).

\*\*figures from multinomial logistic regression modelling
