# Supplementary material for: Alcohol consumption and internalising disorders in young adults of ALSPAC: a population-based study
Source: PubMed Central journal article supplement (PMC8886795; doi:10.1136/jech-2020-213922), 2020-07-06
Supplement: NIHMS1780577-supplement-Supplementary_Material5.pdf [file NIHMS1780577-supplement-Supplementary_Material5.pdf]

#### Appendix 4 - SENSITIVITY ANALYSIS RESULTS

*The prevalence of generalised anxiety disorder (GAD), depression and fear-based anxieties and alcohol phenotypes by sex using new alcohol thresholds*

| <b>24-year clinic<br/>(TF5)<br/>n=3572</b> | Anxiety GAD<br>(n, %) | Depression<br>(n, %)  | Fear-based<br>Anxieties~<br>(n, %) | Alcohol Phenotype<br>(n, %) |                        |              |
|--------------------------------------------|-----------------------|-----------------------|------------------------------------|-----------------------------|------------------------|--------------|
|                                            |                       |                       |                                    | 0                           | 1                      | 2            |
| Overall                                    | 347 (9.7%)            | 391 (10.9%)           | 37 (1.0%)                          | 1431 (40.06%)               | 1710 (47.87%)          | 431 (12.07%) |
| Female<br>(n=2236)                         | 260 (11.6%)           | 299 (13.4%)           | 30 (1.3%)                          | 1001 (44.77%)               | 1020 (45.62%)          | 215 (9.62 %) |
| Males (n=1336)                             | 87 (6.5%)             | 92 (6.9%)             | 7 (0.5%)                           | 430 (32.71%)                | 690 (51.65%)           | 216 (16.17%) |
| <i>chi2, p value</i>                       | 25, <i>p</i> <0.001   | 36.1, <i>p</i> <0.001 | 5.5, <i>p</i> =0.02                |                             | 69.15, <i>p</i> <0.001 |              |

~ Fear-based anxieties is an amalgamation of panic disorder, agoraphobia and social phobia

\*\*Alcohol phenotype groups: 0= lower-risk drinkers, 1=hazardous drinkers, 2=harmful drinkers



**SENSITIVITY ANALYSIS RESULTS**

*Logistic regression model outputs based on imputed dataset when comparing hazardous drinkers and harmful drinkers to lower-risk drinkers using revised alcohol thresholds.*

| <b>24-year clinic</b>       | Prevalence rates<br>(n, %) | Crude (model 1)<br>OR (95% CI, p value) | Model 2*<br>OR (95% CI, p value) | Model 3*<br>OR (95% CI, p value) |
|-----------------------------|----------------------------|-----------------------------------------|----------------------------------|----------------------------------|
| <b>Anxiety, GAD</b>         |                            |                                         |                                  |                                  |
| <i>Lower-risk drinkers</i>  | 163 (11.39)                | -                                       | -                                | -                                |
| <i>Hazardous drinkers</i>   | 129 (7.55)                 | 0.64 (0.50-0.80)                        | 0.67 (0.53-0.86)                 | 0.66 (0.50-0.88)                 |
| <i>Harmful drinkers</i>     | 55 (12.76)                 | 1.14 (0.82-1.57)                        | 1.28 (0.92-1.78)                 | 1.36 (0.94-1.97)                 |
|                             |                            | <i>p&lt;0.001</i>                       | <i>p&lt;0.001</i>                | <i>p&lt;0.001</i>                |
| <b>Depression</b>           |                            |                                         |                                  |                                  |
| <i>Low risk drinkers</i>    | 180 (12.58)                | -                                       | -                                | -                                |
| <i>Hazardous drinkers</i>   | 140 (8.19)                 | 0.62 (0.49-0.79)                        | 0.66 (0.52-0.84)                 | 0.68 (0.54-0.86)                 |
| <i>Harmful drinkers</i>     | 71 (16.47)                 | 1.37 (1.01-1.84)                        | 1.59 (1.17-2.15)                 | 1.63 (1.15-2.30)                 |
|                             |                            | <i>p&lt;0.001</i>                       | <i>p&lt;0.001</i>                | <i>p&lt;0.001</i>                |
| <b>Fear-based Anxieties</b> |                            |                                         |                                  |                                  |
| <i>Low risk drinkers</i>    | 17 (1.19)                  | -                                       | -                                | -                                |
| <i>Hazardous drinkers</i>   | 11 (0.62)                  | 0.49 (0.22-1.07)                        | 0.53 (0.24-1.17)                 | 0.49 (0.19-1.23)                 |
| <i>Harmful drinkers</i>     | 9 (2.37)                   | 1.98 (0.89-4.35)                        | 2.36 (1.05-5.23)                 | 3.19 (1.36-7.44)                 |
|                             |                            | <i>p=0.009</i>                          | <i>p=0.001</i>                   | <i>p=0.001</i>                   |

*\*Model 1 (crude). Model 2 adjusted for sex. Model 3 adjusted for sex, social status, income and maternal education*

*~Estimates are accompanied by omnibus p-values with two degrees of freedom to assess differences in odds across all alcohol groups*
